# Supplementary figures and images for: Molecular characterization of metastatic pancreatic neuroendocrine tumors (PNETs) using whole-genome and transcriptome sequencing
Source: PubMed Central journal article supplement — Cold Spring Harb Mol Case Stud. 2018 Feb;4(1):a002329. doi: 10.1101/mcs.a002329 (PMC5793777; doi:10.1101/mcs.a002329), 2018-02

**A****Case 3**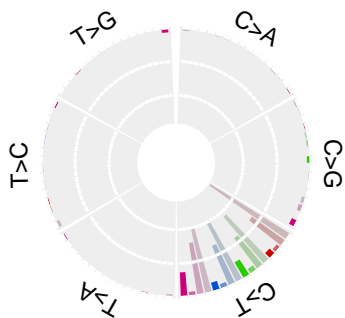**B****Signature 30**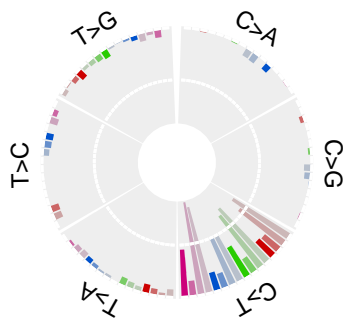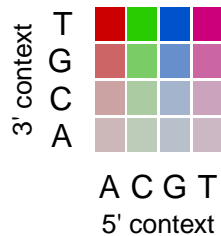**C**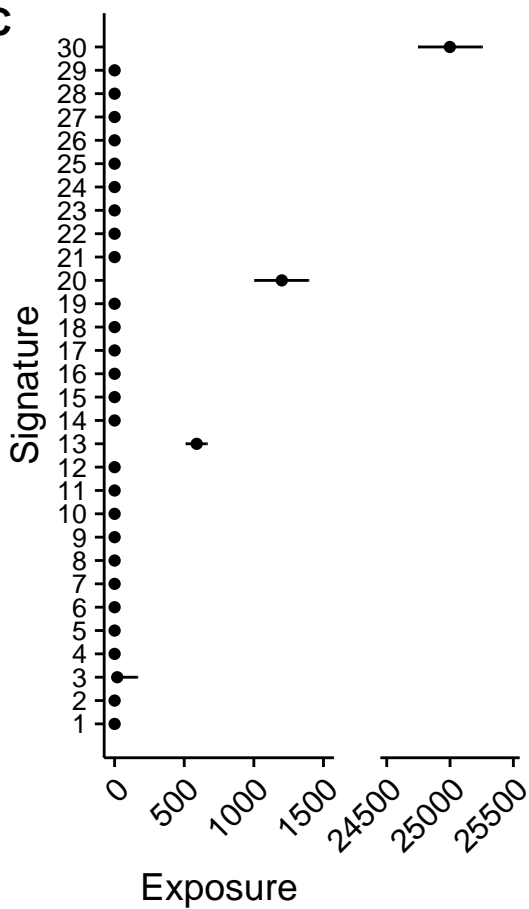**D**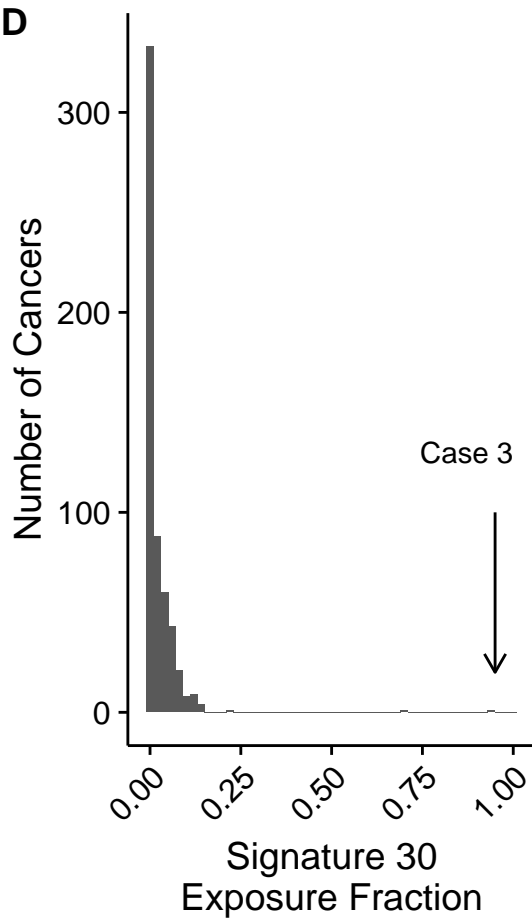

Supplement: supp_mcs.a002329_Supplemental_Figure_2.pdf [file supp_mcs.a002329_Supplemental_Figure_2.pdf]
